# Supplementary material for: Metabolic marker gene mining provides insight in global mcrA diversity and, coupled with targeted genome reconstruction, sheds further light on metabolic potential of the Methanomassiliicoccales
Source: PeerJ journal article supplement (doi:10.7717/peerj.5614), 2018-09-17

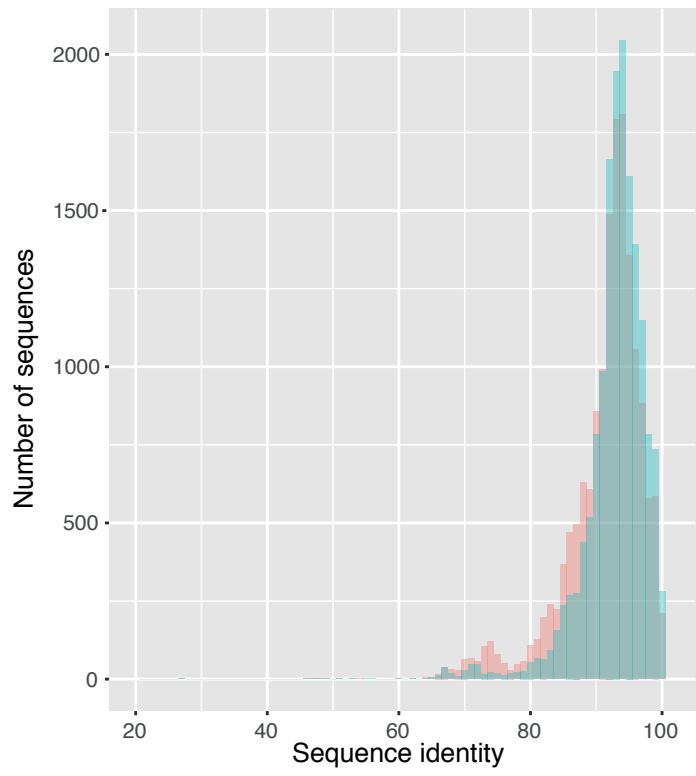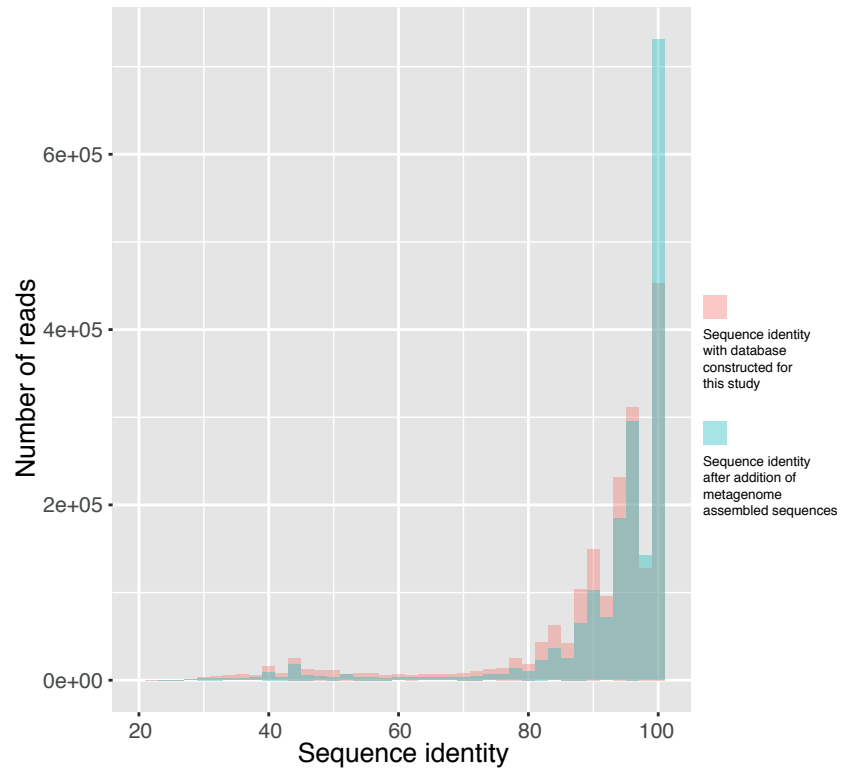

Supplement: Supplemental_figure_3.pdf [file Supplemental_figure_3.pdf]
